# Supplementary material for: Cannabis Sativa targets mediobasal hypothalamic neurons to stimulate appetite
Source: Sci Rep. 2023 Dec 27;13:22970. doi: 10.1038/s41598-023-50112-5 (PMC10752887; doi:10.1038/s41598-023-50112-5)
Supplement: Supplementary file 1 — Supplementary Tables. [file 41598_2023_50112_MOESM1_ESM.docx]

**Supplemental Data**

***Cannabis Sativa* Targets Mediobasal Hypothalamic Neurons to Stimulate Appetite.**

Emma C. Wheeler1, Pique Choi1, Joanne De Howitt1, Sumeen Gill1, Shane Watson1, Sue Yu1, Peyton Wahl1, Cecilia Diaz1, Claudia Mohr1, Amy Zinski2, Zhihua Jiang2, David Rossi1, Jon F. Davis1

1. Department of Integrative Physiology and Neuroscience, Washington State University, Pullman, WA, USA.

2. Department of Animal Sciences, Washington State University, Pullman, WA, USA.

**Abbreviated title**: MBH Neurons Regulate Cannabis-Induced Feeding

Correspondence should be addressed to:

Jon F. Davis, PhD

Veterinary Biomedical Research Building, Room 115

Washington State University

Pullman, WA 99164

509-335-8163

Jon.davis@wsu.edu

Funding: State of Washington Dedicated Marijuana Account (dMAc) grant from the Alcohol and Drug Abuse Research Program (ADARP) grant number 130625–003 to JFD, and NIAAA grant R01AA026078 to DJR.

Disclosures: The authors declare no conflict of interest

Keywords: Cannabis, AgRP, Feeding

*Wheeler et al. – Data Supplement MBH Neurons Regulate Cannabis-Induced Feeding*

**Supplemental Table S1. ANOVA Analysis of meal patterns of air and cannabis exposed rats.**

| ***Source*** | | ***F-Statistic*** | ***p-value*** | ***ηp2*** |
| --- | --- | --- | --- | --- |
| *Average Chow Intake ††* | |  |  |  |
|  | Time (1hr-4hr) | 64.474 | **<0.0001** | 0.746 |
|  | Drug (Air v. Cannabis) | 7.038 | **0.015** | 0.242 |
|  | Time*Drug | 0.542 | 0.655 | 0.024 |
|  |  |  |  |  |
| *Meal Size Over Time ††* | |  |  |  |
|  | Time (1hr-4hr) | 3.436 | 0.038 | 0.135 |
|  | Drug (Air v. Cannabis) | 0.075 | 0.787 | 0.003 |
|  | Time*Drug | 1.062 | 0.358 | 0.046 |
|  |  |  |  |  |
| *Average Meal Size †* | | 9.375 | **0.006** | 0.299 |
|  |  |  |  |  |
| *Average Meal Number over Time ††* | |  |  |  |
|  | Time (1hr-4hr) | 1.248 | 0.299 | 0.054 |
|  | Drug (Air v. Cannabis) | 11.181 | **0.003** | 0.337 |
|  | Time*Drug | 1.582 | 0.202 | 0.067 |
|  |  |  |  |  |
| *Cumulative Meal Number †* | | 11.050 | **0.003** | 0.334 |

*n=12/group. † One-Way ANOVA. †† Two-Way ANOVA with Repeated Measures Means Comparisons; Tukey HSD, α = 0.05. ηp2: partial eta squared effect size. Degrees of Freedom: Time(3), Interaction(3), Error Within Subjects (66), Drug(1), Error Between Subjects(22).*

*Wheeler et al. – Data Supplement MBH Neurons Regulate Cannabis-Induced Feeding*

**Supplemental Table S2.** **Tukey HSD means comparison of meal patterns in air and cannabis exposed rats.**

| ***Measurement*** | | | ***Air***  *Mean ± SEM* | ***Cannabis***  *Mean ± SEM* | ***Mean Difference***  *(95% CI)* | ***q-value*** | ***p-value*** |
| --- | --- | --- | --- | --- | --- | --- | --- |
| *Chow Intake ††* | | |  |  |  |  |  |
|  | *Air v. Cannabis (Overall)* | | 2.526 ± 0.306 | 4.433 ± 0.650 | 1.907 (0.416 to 3.398) | 3.752 | **0.015** |
|  | *Drug*Time* | |  |  |  |  |  |
|  |  | 1 hour | 0.015 ± 0.009 | 1.644 ± 0.568 | 1.629 (-0.119 to 3.377) | 2.631 | 0.067 |
|  |  | 2 hours | 1.258 ± 0.457 | 3.757 ± 0.815 | 2.499 (0.751 to 4.247) | 4.037 | **0.006** |
|  |  | 3 hours | 3.441 ± 0.485 | 5.370 ± 0.736 | 1.929 (0.181 to 3.677) | 3.115 | **0.031** |
|  |  | 4 hours | 5.391 ± 0.682 | 6.962 ± 0.793 | 1.571 (-0.177 to 3.319) | 2.538 | 0.077 |
|  |  |  |  |  |  |  |  |
| *Meal Size Over Time ††* | | |  |  |  |  |  |
|  | *Air v. Cannabis (Overall)* | | 0.842 ± 0.359 | 0.793 ± 0.129 | -0.049 (-0.420 to 0.322) | 0.387 | 0.787 |
|  | *Drug*Time* | |  |  |  |  |  |
|  |  | 1 hour | 0.000 ± 0.000 | 0.519 ± 0.138 | 0.519 (-0.294 to 1.332) | 1.802 | 0.207 |
|  |  | 2 hours | 1.018 ± 0.417 | 1.081 ± 0.250 | 0.062 (-0.751 to 0.876) | 0.217 | 0.879 |
|  |  | 3 hours | 1.049 ± 0.334 | 0.620 ± 0.173 | -0.429 (-1.242 to 0.384) | 1.489 | 0.296 |
|  |  | 4 hours | 1.300 ± 0.419 | 0.951 ± 0.302 | -0.348 (-1.162 to 0.465) | 1.210 | 0.395 |
|  |  |  |  |  |  |  |  |
| *Cumulative Meal Number Over Time ††* | | | |  |  |  |  |
|  | *Air v. Cannabis (Overall)* | | 0.833 ± 0.354 | 1.729 ± 0.216 | 0.896 (0.340 to 1.451) | 4.729 | **0.003** |
|  | *Drug*Time* | |  |  |  |  |  |
|  |  | 1 hour | 0.000 ± 0.000 | 1.750 ± 0.524 | 1.750 (0.512 to 2.988) | 3.992 | **0.006** |
|  |  | 2 hours | 0.750 ± 0.218 | 2.083 ± 0.417 | 1.333 (0.096 to 2.571) | 3.042 | **0.035** |
|  |  | 3 hours | 1.417 ± 0.452 | 2.000 ± 0.651 | 0.583 (-0.654 to 1.821) | 1.331 | 0.350 |
|  |  | 4 hours | 1.167 ± 0.423 | 1.083 ± 0.484 | -0.083 (-1.321 to 1.154) | 0.190 | 0.893 |

*n=12/group. †† Two-Way ANOVA with Repeated Measures Means Comparisons, Tukey HSD* *α = 0.05. Degrees of Freedom: Drug(22), Interaction(66/per timepoint).*

*Wheeler et al. – Data Supplement MBH Neurons Regulate Cannabis-Induced Feeding*

**Supplemental Table S3. ANOVA analysis of locomotor activity data between home cage, open field, air, and cannabis rats.**

| ***Source*** | | ***F-Statistic*** | ***p-value*** | ***ηp2*** |
| --- | --- | --- | --- | --- |
| *Distance ††* | |  |  |  |
|  | Drug (Air v. Cannabis) | 6.376 | **0.0243** | 0.313 |
|  | Location (Home Cage v. Open Field) | 53.03 | **<0.001** | 0.791 |
|  | Interaction | 6.266 | **0.0253** | 0.309 |
|  |  |  |  |  |
| *Time Spent Moving ††* | |  |  |  |
|  | Drug (Air v. Cannabis) | 6.612 | **0.0222** | 0.321 |
|  | Location (Home Cage v. Open Field) | 35.387 | **<0.001** | 0.717 |
|  | Interaction | 4.416 | 0.0542 | 0.240 |
|  |  |  |  |  |
| *Time Spent Still ††* | |  |  |  |
|  | Drug (Air v. Cannabis) | 5.978 | **0.0283** | 0.299 |
|  | Location (Home Cage v. Open Field) | 34.006 | **<0.001** | 0.708 |
|  | Interaction | 5.017 | **0.0418** | 0.264 |
|  |  |  |  |  |
| *Distance – Home Cage Group Only ††* | |  |  |  |
|  | Time (1hr-4hr) | 45.153 | **<0.001** | 0.849 |
|  | Drug (Air v. Cannabis) | 5.678 | **0.044** | 0.415 |
|  | Interaction | 0.510 | 0.679 | 0.060 |

*†† Two-Way ANOVA. n=12/group. Degrees of Freedom for each section: Drug(1), Location(1), Interaction(1), Model(3), Error(14). α = 0.05.*

*Wheeler et al. – Data Supplement MBH Neurons Regulate Cannabis-Induced Feeding*

**Supplemental Table S4. Fisher LSD means comparison of locomotor activity in open field and home cage, air and cannabis exposed rats.**

| ***Measurement*** | | | ***Mean Difference***  *(95% CI)* | ***q-value*** | ***p-value*** |
| --- | --- | --- | --- | --- | --- |
| *Distance* | | |  |  |  |
|  | Cannabis – HC | Cannabis – OF | -1431.6 (-2297.9 to -565.2) | -3.544 | **0.0032** |
|  | Air – OF | Cannabis – OF | -6.578 (-955.6 to 942.5) | -0.015 | 0.9884 |
|  |  | Cannabis – HC | 1425.0 (558.7 to 2291.4) | 3.528 | **0.0034** |
|  | Air – HC | Cannabis – OF | -2937.9 (-3886.9 to -1988.8) | -6.639 | **<0.0001** |
|  |  | Cannabis – HC | -1506.3 (-2372.7 to -640.0) | -3.729 | **0.0022** |
|  |  | Air – OF | -2931.3 (-3880.4 to -1982.3) | -6.625 | **<0.0001** |
|  |  |  |  |  |  |
| *Time Spent Moving* | | |  |  |  |
|  | Cannabis – HC | Cannabis – OF | 666.7 (427.2 to 906.2) | 5.970 | **<0.0001** |
|  | Air – OF | Cannabis – OF | -38.92 (-301.3 to 223.5) | -0.318 | 0.7551 |
|  |  | Cannabis – HC | -705.6 (-945.2 to -466.1) | -6.319 | **<0.0001** |
|  | Air – HC | Cannabis – OF | 279.7 (17.34 to 542.1) | 2.287 | **0.0383** |
|  |  | Cannabis – HC | -387.0 (-626.5 to -147.5) | -3.465 | **0.0038** |
|  |  | Air – OF | 318.6 (56.26 to 581.0) | 2.605 | **0.0208** |
|  |  |  |  |  |  |
| *Time Spent Still* | | |  |  |  |
|  | Cannabis – HC | Cannabis – OF | -666.8 (-905.7 to -427.9) | -5.986 | **<0.0001** |
|  | Air – OF | Cannabis – OF | 16.94 (-244.8 to 278.6) | 0.139 | 0.8916 |
|  |  | Cannabis – HC | 683.7 (444.8 to 922.6) | 6.138 | **<0.0001** |
|  | Air – HC | Cannabis – OF | -279.8 (-541.5 to -18.05) | -2.293 | **0.0379** |
|  |  | Cannabis – HC | 387.0 (148.1 to 625.9) | 3.474 | **0.0037** |
|  |  | Air – OF | -296.7 (-558.4 to -34.98) | -2.431 | **0.0291** |
|  |  |  |  |  |  |
| *Distance – Home Cage Group Only* | | |  |  |  |
|  | Air v. Cannabis | | 2877.8 (1689.1 to 4066.5) | 5.477 | **3.918E-4** |
|  |  | 1 hour | 2439.3 (282.97 to 4595.7) | 2.321 | **0.0281** |
|  |  | 2 hours | 2830 (673.6 to 4986.3) | 2.692 | **0.0120** |
|  |  | 3 hours | 2995.1 (838.8 to 5151.5) | 2.850 | **0.0083** |
|  |  | 4 hours | 3246.9 (1090.6 to 5403.2) | 3.090 | **0.0046** |

*Abbreviations: Home Cage (Sable Promethion Metabolic Chambers) – HC, Open Field – OC. Notes: Means compared using Fisher LSD; Home cage rats: n=6/experimental group, n=4/control group; Open field rats: n=4/group. α = 0.05.*

*Wheeler et al. – Data Supplement MBH Neurons Regulate Cannabis-Induced Feeding*

**Supplemental Table S5. ANOVA analyses for metabolic data of cannabis and air exposed rats.**

| ***Measurements*** | | | ***F-Statistic*** | ***p-Value*** | ***ηp2*** |
| --- | --- | --- | --- | --- | --- |
| *Energy Expenditure (kcal/hr)* | | |  |  |  |
|  | Time (3min bins) | | 8.788 | **<0.001** | 0.239 |
|  | Drug (Air v. Cannabis) | | 5.535 | **0.026** | 0.165 |
|  | Interaction | | 1.171 | 0.314 | 0.040 |
|  |  | |  |  |  |
| *Respiratory Exchange Rate* | |  |  |  |  |
|  | Time (3min bins) | | 24.986 | **<0.001** | 0.472 |
|  | Drug (Air v. Cannabis) | | 0.817 | 0.374 | 0.028 |
|  | Interaction | | 1.724 | 0.084 | 0.058 |
|  |  | |  |  |  |
| *Rate of Oxygen Consumption (VO2)* | | |  |  |  |
|  | Time (3min bins) | | 9.381 | **<0.001** | 0.251 |
|  | Drug (Air v. Cannabis) | | 4.587 | **0.041** | 0.141 |
|  | Interaction | | 1.195 | 0.299 | 0.041 |
|  |  |  |  |  |  |
| *Rate of Carbon Dioxide Emission (VCO2)* | | |  |  |  |
|  | Time (3min bins) | | 6.920 | **<0.001** | 0.198 |
|  | Drug (Air v. Cannabis) | | 3.692 | 0.065 | 0.116 |
|  | Interaction | | 1.278 | 0.249 | 0.044 |

*Two-Way ANOVA repeated measures. n=6/experimental, n=4/control. Degrees of freedom Time(9), Interaction(9), Error Within-Subjects(252), Drug(1), Error Between-Subjects(28). α = 0.05.*

*Wheeler et al. – Data Supplement MBH Neurons Regulate Cannabis-Induced Feeding*

**Supplemental Table S6. ANOVA results for operant conditioning touches and touch latency of air and cannabis exposed rats**

|  |  | ***Number of Touches*** | | | ***Touch Latency*** | | |
| --- | --- | --- | --- | --- | --- | --- | --- |
| ***Measurement*** | | ***F-Statistic*** | ***p-value*** | ***ηp2*** | ***F-Statistic*** | ***p-value*** | ***ηp2*** |
| *Correct Touches* | |  |  |  |  |  |  |
|  | Time (1hr v. 2hr) | 2.828 | 0.124 | 0.220 | 0.016 | 0.903 | 0.002 |
|  | Drug (Air v. Cannabis) | 1.945 | 0.193 | 0.163 | 1.975 | 0.190 | 0.165 |
|  | Interaction | 6.455 | **0.029** | 0.392 | 0.495 | 0.498 | 0.047 |
|  |  |  |  |  |  |  |  |
| *Blank Touches* | |  |  |  |  |  |  |
|  | Time (1hr v. 2hr) | 14.82 | **0.003** | 0.597 | 0.355 | 0.564 | 0.034 |
|  | Drug (Air v. Cannabis) | 0.543 | 0.478 | 0.051 | 0.505 | 0.494 | 0.048 |
|  | Interaction | 10.66 | **0.008** | 0.516 | 0.890 | 0.368 | 0.082 |

Two-way ANOVA repeated measures, correct or blank touch and time. *ηp2 = partial eta squared effect size. Degrees of Freedom: Time(1), Interaction(1), Within-Subjects Error(10), Drug(1), Between-Subjects Error(10). α = 0.05.*

*Wheeler et al. – Data Supplement MBH Neurons Regulate Cannabis-Induced Feeding*

**Supplemental Table S7. Tukey HSD means comparison of operant conditioning responses between air and cannabis exposed rats.**

| ***Measurement*** | | | | ***Mean Difference***  *(95% CI)* | ***q-value*** | ***p-value*** |
| --- | --- | --- | --- | --- | --- | --- |
| ***Number of Touches*** | | |  |  |  |  |
|  | *Correct Touches* | |  |  |  |  |
|  | | 1-hour Air | 1-hour Cannabis | -12.67 (-24.64 to -0.698) | 3.335 | **0.040** |
|  | |  | 2-hour Air | -2.0 (-9.338 to 5.338) | 0.859 | 0.557 |
|  | | 1-hour Cannabis | 2-hour Cannabis | 9.833 (2.495 to 17.17) | 4.222 | **0.014** |
|  | | 2-hour Air | 2-hour Cannabis | -0.833 (-12.80 to 11.14) | 0.219 | 0.880 |
|  | |  |  |  |  |  |
|  | *Blank Touches* | |  |  |  |  |
|  | | 1-hour Air | 1-hour Cannabis | -8.333 (-17.48 to 0.815) | 2.870 | 0.070 |
|  | |  | 2-hour Air | 1.00 (-4.388 to 6.388) | 0.585 | 0.688 |
|  | | 1-hour Cannabis | 2-hour Cannabis | 12.17 (6.779 to 17.55) | 7.116 | **5.13E-4** |
|  | | 2-hour Air | 2-hour Cannabis | 2.833 (-6.315 to 11.98) | 0.976 | 0.506 |
|  | |  |  |  |  |  |
| ***Touch Latency*** | | |  |  |  |  |
|  | *Correct Touch Latency* | |  |  |  |  |
|  | | 1-hour Air | 1-hour Cannabis | 28.73 (-12.02 to 69.49) | 2.222 | 0.147 |
|  | |  | 2-hour Air | 4.993 (-22.20 to 32.19) | 0.579 | 0.691 |
|  | | 1-hour Cannabis | 2-hour Cannabis | -7.153 (-34.35 to 20.04) | 0.829 | 0.571 |
|  | | 2-hour Air | 2-hour Cannabis | 16.59 (-24.16 to 57.34) | 1.283 | 0.386 |
|  | |  |  |  |  |  |
|  | | |  |  |  |  |
|  | *Blank Touch Latency* | |  |  |  |  |
|  | | 1-hour Air | 1-hour Cannabis | 12.15 (-10.98 to 35.28) | 1.655 | 0.269 |
|  | |  | 2-hour Air | 2.563 (-20.70 to 25.83) | 0.347 | 0.811 |
|  | | 1-hour Cannabis | 2-hour Cannabis | -11.36 (-34.63 to 11.90) | 1.539 | 0.302 |
|  | | 2-hour Air | 2-hour Cannabis | -1.780 (-24.91 to 21.35) | 0.243 | 0.867 |

*Two-way ANOVA repeated measures post-hoc means comparison. Degrees of freedom: 10. α = 0.05.*

*Wheeler et al. – Data Supplement MBH Neurons Regulate Cannabis-Induced Feeding*

**Supplemental Table S8. Tukey HSD means comparison of cannabis dose response in mice.**

| ***Measurement*** | | | ***Mean Difference***  *(95% CI)* | ***q-value*** | ***p-value*** |
| --- | --- | --- | --- | --- | --- |
| *Dose Response Mouse Model* | | |  |  |  |
|  | *Air* | 100mg | -0.122 (-0.470 to 0.226) | 1.471 | 0.730 |
|  |  | 200mg | -0.440 (-0.788 to -0.092) | 5.306 | **0.013** |
|  |  | 400mg | 0.312 (-0.036 to 0.660) | 3.762 | 0.085 |
|  |  |  |  |  |  |
|  | *100mg* | 200mg | -0.318 (-0.666 to 0.030) | 3.834 | 0.078 |
|  |  | 400mg | 0.434 (0.086 to 0.782) | 5.233 | **0.014** |
|  |  |  |  |  |  |
|  | *200mg* | 400mg | 0.752 (0.404 to 1.100) | 9.068 | **1.70E-4** |

*One-way repeated measures ANOVA, F(3,12) = 14.065, ***p = 0.0003, ηp2 = 0.779. n=5. α = 0.05.*

*Wheeler et al. – Data Supplement MBH Neurons Regulate Cannabis-Induced Feeding*

**Supplemental Table S9. ANOVA results for active cells during Ca2+ imaging of ARC neurons during feeding and anticipation, and air or cannabis exposure.**

| ***Measurement*** | | ***F-Statistic*** | ***p-Value*** | ***ηp2*** |
| --- | --- | --- | --- | --- |
| *All Cells Per Condition* | |  |  |  |
|  | Drug (Air v. Cannabis) | 21.745 | **0.0186** | 0.879 |
|  | Feeding (Anticipation v. Consumption) | 0.4551 | 0.5483 | 0.132 |
|  | Interaction | 13.364 | **0.0354** | 0.817 |
|  |  |  |  |  |
| *Cells Active Only in Condition* | |  |  |  |
|  | Drug (Air v. Cannabis) | 21.745 | **0.0186** | 0.879 |
|  | Feeding (Anticipation v. Consumption) | 0.0224 | 0.8904 | 0.007 |
|  | Interaction | 13.364 | **0.0354** | 0.817 |

*Two-way ANOVA repeated measures. n=4. ηp2 = partial eta squared effect size. Degrees of Freedom: Drug(1), Drug Error(3), Feeding Stage(1), Feeding Stage Error(3), Interaction(1), Interaction Error(3). α = 0.05.*

*Wheeler et al. – Data Supplement MBH Neurons Regulate Cannabis-Induced Feeding*

**Supplemental Table S10. Tukey HSD means comparison of active cell counts during air and cannabis exposure in Ca2+ imaging.**

|  |  | | ***Total Active Cells by Condition*** | | | ***Cells Active Only in Specified Condition*** | | |
| --- | --- | --- | --- | --- | --- | --- | --- | --- |
| ***Measurement*** | | | ***Mean Difference***  *(95% CI)* | ***q-Value*** | ***p-Value*** | ***Mean Difference***  *(95% CI)* | ***q-Value*** | ***p-Value*** |
| *Drug* | | |  |  |  |  |  |  |
|  | *Air v. Cannabis* | | -29.38 (-42.02 to -16.73) | 10.45 | **0.005** | -29.38 (-42.02 to -16.73) | 10.45 | **0.005** |
|  |  | |  |  |  |  |  |  |
| *Feeding* | | |  |  |  |  |  |  |
|  | *Anticipation v. Consumption* | | 0.375 (-12.27 to 13.02) | 0.134 | 0.931 | 0.375 (-12.27 to 13.02) | 0.134 | 0.931 |
|  |  | |  |  |  |  |  |  |
| *Drug*Feeding* | | |  |  |  |  |  |  |
|  | *Anticipation v. Consumption* | |  |  |  |  |  |  |
|  |  | Air | -11.5 (-43.61 to 20.61) | 1.612 | 0.337 | -4.0 (-21.89 to 13.89) | 1.007 | 0.528 |
|  |  | Cannabis | -2.75 (-34.86 to 29.36) | 0.386 | 0.803 | 4.75 (-13.14 to 22.64) | 1.195 | 0.460 |
|  | *Air v. Cannabis* | |  |  |  |  |  |  |
|  |  | Anticipation | -33.75 (-65.86 to -1.643) | 4.731 | **0.044** | -33.75 (-51.64 to -15.86) | 8.493 | **0.009** |
|  |  | Consumption | -25.0 (-57.11 to 7.107) | 3.505 | 0.089 | -25.0 (-42.89 to -7.114) | 6.291 | **0.021** |

*Two-way ANOVA repeated measures post-hoc Tukey HSD test, n=4. α = 0.05.*

*Wheeler et al. – Data Supplement MBH Neurons Regulate Cannabis-Induced Feeding*

**Supplemental Table S11. ANOVA results of AgRP DREADD infected mice given saline or CNO and cannabis or air.**

| ***Measurements*** | | | | ***[F-Statistic]***  ***t-Value*** | ***p-Value*** | ***ηp2*** |
| --- | --- | --- | --- | --- | --- | --- |
| *30 minutes* | | | |  |  |  |
|  | Drug (Air v. Cannabis) | | | 5.406 | **0.037** | 0.294 |
|  | Injection (Saline v. CNO) | | | 1.948 | 0.186 | 0.130 |
|  | Interaction | | | 6.437 | **0.025** | 0.331 |
|  |  |  |  |  |  |  |
| *1 hour* | | | |  |  |  |
|  | Drug (Air v. Cannabis) | | | 6.614 | **0.023** | 0.337 |
|  | Injection (Saline v. CNO) | | | 4.257 | 0.060 | 0.247 |
|  | Interaction | | | 5.579 | **0.034** | 0.300 |
|  |  |  |  |  |  |  |
| *2 hours* | | | |  |  |  |
|  | Drug (Air v. Cannabis) | | | 8.374 | **0.013** | 0.392 |
|  | Injection (Saline v. CNO) | | | 1.800 | 0.203 | 0.122 |
|  | Interaction | | | 0.976 | 0.314 | 0.070 |

*Two-way ANOVA repeated measures, n=14. Degrees of freedom: Drug(1), Drug Error (13), Injection(1), Injection Error(13), Interaction(1), Interaction Error(13). α = 0.05.*

*Wheeler et al. – Data Supplement MBH Neurons Regulate Cannabis-Induced Feeding*

**Supplemental Table S12. Tukey HSD means comparison of AgRP DREADD infected mice given saline or CNO and cannabis or air.**

| ***Measurements*** | | | | | ***Mean Difference***  *(95% CI)* | ***q-Value*** | ***p-Value*** |
| --- | --- | --- | --- | --- | --- | --- | --- |
| *30 minutes* | | | | |  |  |  |
|  |  | Air – Saline | | Air – CNO | -0.725 (-2.541 to 1.091) | 1.220 | 0.404 |
|  |  |  | | Cannabis – Saline | -2.979 (-4.794 to -1.163) | 5.012 | **0.004** |
|  |  | Air – CNO | | Cannabis – CNO | 0.013 (-1.802 to 1.829) | 0.023 | 0.987 |
|  |  | Cannabis – Saline | | Cannabis – CNO | 2.267 (0.452 to 4.083) | 3.815 | **0.018** |
|  |  | |  |  |  |  |  |
| *1 hour* | | | | |  |  |  |
|  |  | Air – Saline | | Air – CNO | -0.768 (-3.136 to 1.599) | 0.992 | 0.495 |
|  |  |  | | Cannabis – Saline | -4.192 (-6.559 to -1.824) | 5.410 | **0.002** |
|  |  | Air – CNO | | Cannabis – CNO | -0.187 (-2.554 to 2.180) | 0.242 | 0.867 |
|  |  | Cannabis – Saline | | Cannabis – CNO | 3.236 (0.869 to 5.603) | 4.177 | **0.011** |
|  |  | |  |  |  |  |  |
| *2 hours* | | | | |  |  |  |
|  |  | Air – Saline | | Air – CNO | 0.430 (-4.024 to 4.885) | 0.295 | 0.838 |
|  |  |  | | Cannabis – Saline | -5.074 (-9.528 to -0.620) | 3.480 | **0.029** |
|  |  | Air – CNO | | Cannabis – CNO | -1.865 (-6.319 to 2.589) | 1.279 | 0.382 |
|  |  | Cannabis – Saline | | Cannabis – CNO | 3.639 (-0.815 to 8.093) | 2.496 | 0.101 |

*Two-way ANOVA repeated measures Tukey HSD post hoc results. α = 0.05.*
